# Supplementary material
Source: publisher figshare collection journal article supplement (https://frontiersin.figshare.com/ndownloader/files/26872136)
Supplement: Supplementary file [file 26872136]

## Supplementary Material

### 1 MAIN TASK IN EXPERIMENT 1

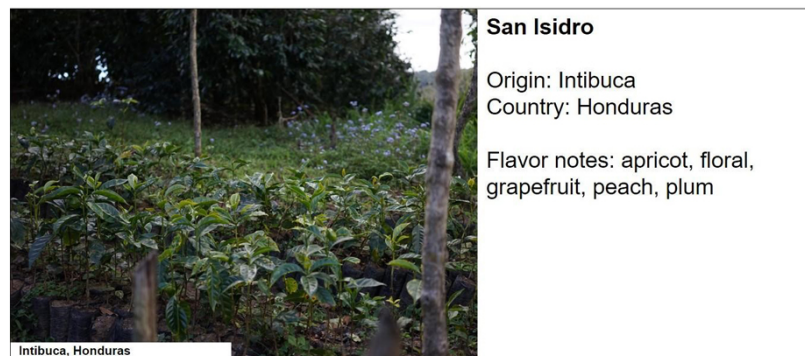

Please consider the coffee presented above and indicate to what extent you agree with the following statements

|                                                                          | Strongly agree        | Somewhat agree        | Neither agree nor disagree | Somewhat disagree     | Strongly disagree     |
|--------------------------------------------------------------------------|-----------------------|-----------------------|----------------------------|-----------------------|-----------------------|
| I do not expect this coffee to be authentic                              | <input type="radio"/> | <input type="radio"/> | <input type="radio"/>      | <input type="radio"/> | <input type="radio"/> |
| I'm willing to pay a higher price for this coffee than for other coffees | <input type="radio"/> | <input type="radio"/> | <input type="radio"/>      | <input type="radio"/> | <input type="radio"/> |
| I am familiar with this coffee                                           | <input type="radio"/> | <input type="radio"/> | <input type="radio"/>      | <input type="radio"/> | <input type="radio"/> |
| I do not expect to like this coffee                                      | <input type="radio"/> | <input type="radio"/> | <input type="radio"/>      | <input type="radio"/> | <input type="radio"/> |
| I expect this coffee to be of high quality                               | <input type="radio"/> | <input type="radio"/> | <input type="radio"/>      | <input type="radio"/> | <input type="radio"/> |
| I expect this to be a premium coffee                                     | <input type="radio"/> | <input type="radio"/> | <input type="radio"/>      | <input type="radio"/> | <input type="radio"/> |

How well do you think this image fits the coffee?

☐ Extremely well

☐ Very well

☐ Moderately well

☐ Slightly well

☐ Not well at all

**Figure S1.** Snapshot of main task in Experiment 1 consisting of premiumness and fit evaluations

## 2 PARTICIPANT'S PROFILE AND RELATIONSHIP WITH COFFEE IN EXPERIMENT 1

In order to get a sense of the profile of respondents and their relationship with specialty coffee, we included questions regarding their coffee consumption habits and motivations using a five-point Likert scale. First, respondents were asked to indicate how often they consumed coffee by selecting the most appropriate option from "Never" to "2 or more times a day". Then, participants indicated their motivations for drinking coffee (to wake up, for pleasure, on special occasions, by habit). Additionally, participants ranked the factors they considered most important when purchasing coffee (brand, coffee format, origin of the coffee, packaging, price, production type, quality, taste). They also indicated how familiar they were with specialty coffee and with each of the four countries of origin of the coffees presented (Burundi, El Salvador, Honduras, Kenya) from "Not familiar at all" to "Extremely familiar".

An analysis of the participants' characteristics revealed that there were no major differences among the groups in terms of coffee consumption behaviours and motivations (S1). Overall, participants were moderate to strong coffee consumers ( $M = 5.14$ ,  $SD = 2.15$ ). They appeared to drink coffee for pleasure ( $M = 3.79$ ,  $SD = 1.37$ ) and reported liking the taste of coffee ( $M = 4.07$ ,  $SD = 1.35$ ). However, participants presented low familiarity with specialty coffee ( $M = 2.32$ ,  $SD = 1.06$ ) and moderate consumption of premium coffee ( $M = 3.09$ ,  $SD = 1.29$ ). There was an indication that participants drank coffee to wake up ( $M = 3.19$ ,  $SD = 1.55$ ) and that they considered drinking coffee as a habit ( $M = 2.97$ ,  $SD = 1.52$ ). Furthermore, participants indicated that the most important factors they consider when purchasing coffee were taste, quality, and price.

**Table S1.** Participants' coffee consumption habits and motivations in Experiment 1. Elements sharing a letter are not significantly different

|                                    | No Origin           |                    |                    |                     | Origin             |                    |                     |                     |
|------------------------------------|---------------------|--------------------|--------------------|---------------------|--------------------|--------------------|---------------------|---------------------|
|                                    | City                |                    | Farm               |                     | City               |                    | Farm                |                     |
|                                    | Label               | No label           | Label              | No label            | Label              | No label           | Label               | No label            |
| Frequency of Coffee Consumption    | 4.91 <sup>a</sup>   | 5.35 <sup>ab</sup> | 5.14 <sup>ab</sup> | 5.19 <sup>ab</sup>  | 4.96 <sup>ab</sup> | 5.27 <sup>ab</sup> | 5.37 <sup>b</sup>   | 4.95 <sup>ab</sup>  |
| Familiar with specialty coffee     | 2.19 <sup>a</sup>   | 2.41 <sup>ab</sup> | 2.39 <sup>ab</sup> | 2.45 <sup>b</sup>   | 2.18 <sup>a</sup>  | 2.35 <sup>ab</sup> | 2.3 <sup>ab</sup>   | 2.33 <sup>ab</sup>  |
| Likes the taste of coffee          | 4.06 <sup>a</sup>   | 4.1 <sup>a</sup>   | 4.11 <sup>a</sup>  | 4.02 <sup>a</sup>   | 3.92 <sup>a</sup>  | 4.03 <sup>a</sup>  | 4.12 <sup>a</sup>   | 4.19 <sup>a</sup>   |
| Consumes Premium Coffee            | 2.99 <sup>abc</sup> | 3.26 <sup>c</sup>  | 3.1 <sup>abc</sup> | 3.12 <sup>abc</sup> | 2.97 <sup>ab</sup> | 3.24 <sup>bc</sup> | 3.08 <sup>abc</sup> | 2.94 <sup>a</sup>   |
| Drinks coffee for pleasure         | 3.82 <sup>b</sup>   | 3.8 <sup>ab</sup>  | 3.84 <sup>b</sup>  | 3.85 <sup>b</sup>   | 3.51 <sup>a</sup>  | 3.89 <sup>b</sup>  | 3.82 <sup>b</sup>   | 3.77 <sup>ab</sup>  |
| Drinks coffee in special occasions | 2.9 <sup>bc</sup>   | 2.66 <sup>ab</sup> | 2.98 <sup>c</sup>  | 2.99 <sup>c</sup>   | 2.57 <sup>a</sup>  | 2.95 <sup>c</sup>  | 2.87 <sup>bc</sup>  | 2.85 <sup>abc</sup> |
| Drinks coffee as a habit           | 2.95 <sup>a</sup>   | 2.95 <sup>a</sup>  | 2.98 <sup>a</sup>  | 3.15 <sup>a</sup>   | 2.85 <sup>a</sup>  | 2.99 <sup>a</sup>  | 3.07 <sup>a</sup>   | 2.86 <sup>a</sup>   |
| Drinks coffee to wake up           | 3.06 <sup>a</sup>   | 3.07 <sup>ab</sup> | 3.21 <sup>ab</sup> | 3.32 <sup>ab</sup>  | 3.13 <sup>ab</sup> | 3.29 <sup>ab</sup> | 3.39 <sup>b</sup>   | 3.04 <sup>a</sup>   |

### 3 EFFECTS OF INDEPENDENT COMPONENTS OF PREMIUMNESS INDEX IN EXPERIMENT 2

**Table S2.** Results of independent ANOVAs on the different components of the premiumness index and linking

|                              | $F$         | $p$          | $\eta_p^2$   |
|------------------------------|-------------|--------------|--------------|
| Quality                      | <b>4.60</b> | <b>0.012</b> | <b>0.062</b> |
| Authenticity                 | 2.29        | 0.105        | 0.032        |
| Premiumness                  | <b>3.43</b> | <b>0.035</b> | <b>0.047</b> |
| Willingness to pay a premium | 2.06        | 0.132        | 0.029        |
| Liking                       | 0.73        | 0.485        | 0.010        |
